# Supplementary material
Source: PubMed Central journal article supplement (PMC2767183)
Supplement: NIHMS112587-supplement-1_si_001.pdf [file NIHMS112587-supplement-1_si_001.pdf]

## Supplemental Information

### 1. PET Supplemental Figures

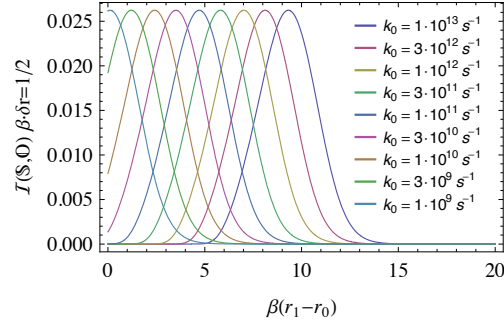

FIG. 18: Dependence of the Mutual information between two states that differ in their PET distance by  $1/2\beta$  with the closer state at  $\beta(r_1 - r_0)$  as indicated on the horizontal axis for several values of  $k_0$ .

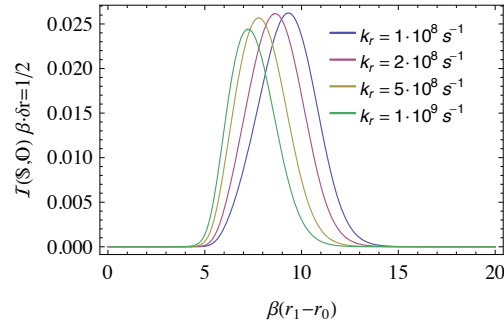

FIG. 19: Dependence of the Mutual information between two states that differ in their PET distance by  $1/2\beta$  with the closer state at  $\beta(r_1 - r_0)$  as indicated on the horizontal axis for several values of  $k_r$ .

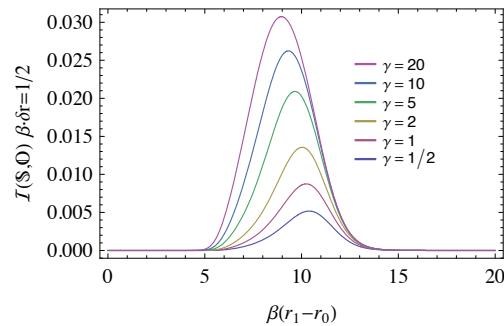

FIG. 20: Dependence of the Mutual information between two states that differ in their PET distance by  $1/2\beta$  with the closer state at  $\beta(r_1 - r_0)$  as indicated on the horizontal axis for several values of  $\gamma$ .

## 2. FRET Supplemental Figures

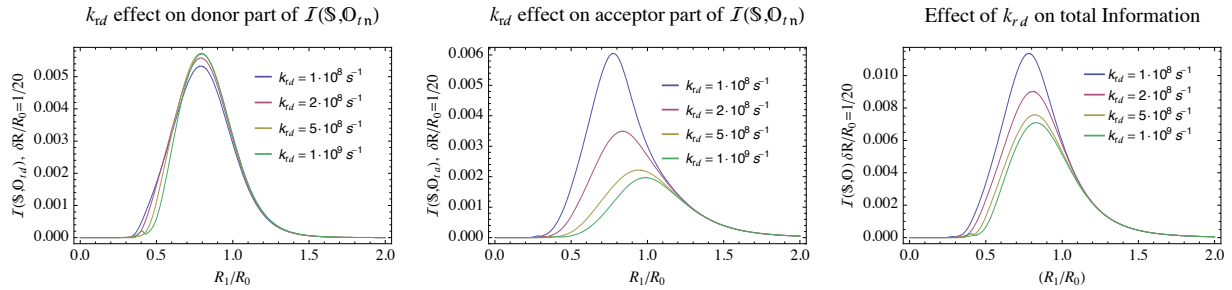

FIG. 21: **Donor Lifetime Dependence** Donor (left), Acceptor (middle), and Total (right) contributions to the Mutual information of two states separated by  $\delta R=R_0/20$  as a function of the closer state distance at varying levels of the donor radiative rate,  $k_{rd}$  as labeled in the figure.

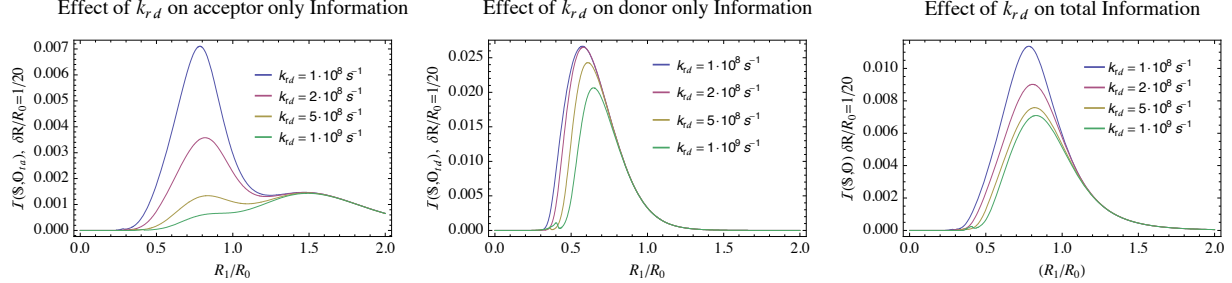

FIG. 22: **Donor Lifetime Dependence** Donor (left), Acceptor (middle), contributions to the Marginal information of two states separated by  $\delta R=R_0/20$  as a function of the closer state distance at varying levels of the donor radiative rate,  $k_{rd}$  as labeled in the figure compared to the Total (right) Mutual information.

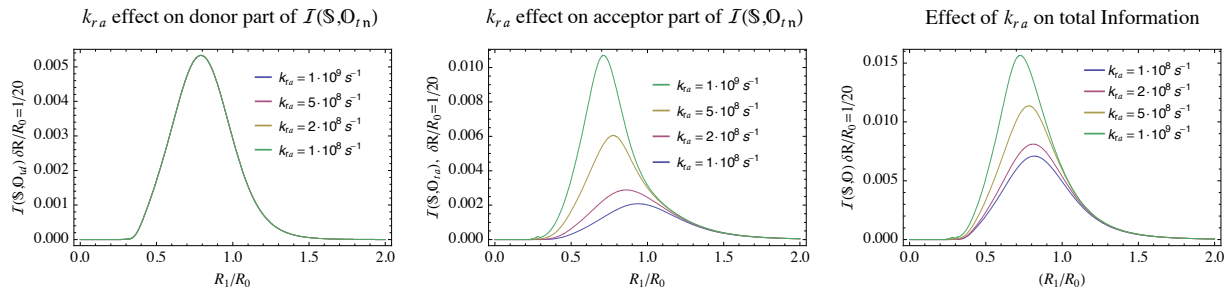

FIG. 23: **Acceptor Lifetime Dependence** Donor (left), Acceptor (middle), and Total (right) contributions to the Mutual information of two states separated by  $\delta R=R_0/20$  as a function of the closer state distance at varying levels of the acceptor radiative rate,  $k_{ra}$  as labeled in the figure.

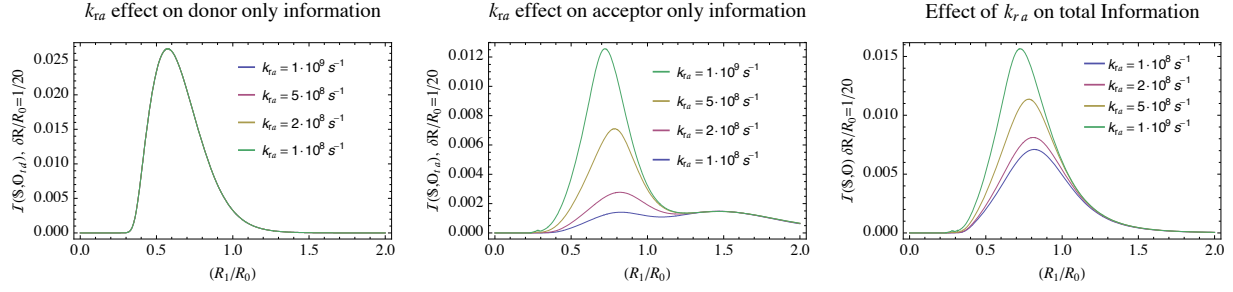

FIG. 24: **Acceptor Lifetime Dependence** Donor (left), Acceptor (middle), contributions to the Marginal information of two states separated by  $\delta R=R_0/20$  as a function of the closer state distance at varying levels of the acceptor radiative rate,  $k_{ra}$  as labeled in the figure compared to the Total (right) Mutual information.

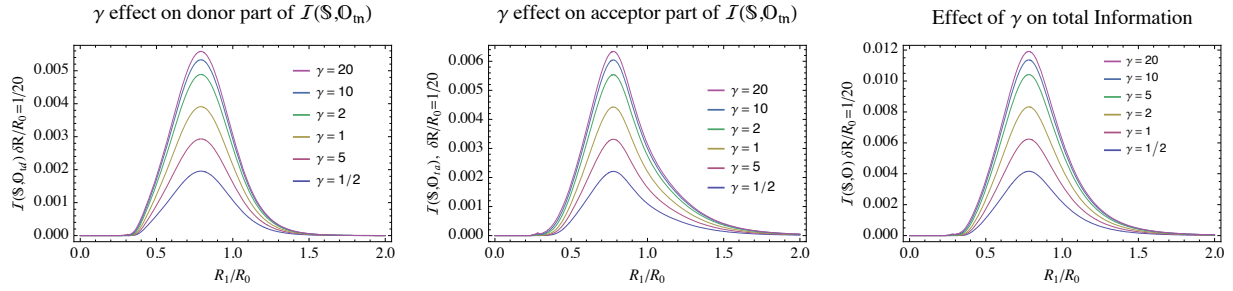

FIG. 25: **Signal:Background Dependence** Donor (left), Acceptor (middle), and Total (right) contributions to the Mutual information of two states separated by  $\delta R=R_0/20$  as a function of the closer state distance at varying levels of signal-to-background,  $\gamma$  as labeled in the figure.

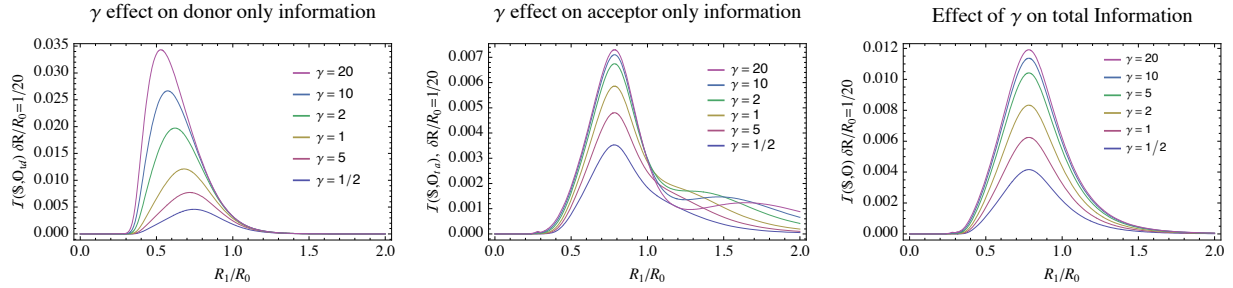

FIG. 26: **Signal:Background Dependence** Donor (left), Acceptor (middle), contributions to the Marginal information of two states separated by  $\delta R=R_0/20$  as a function of the closer state distance at varying levels of signal-to-background,  $\gamma$  as labeled in the figure compared to the Total (right) Mutual information.

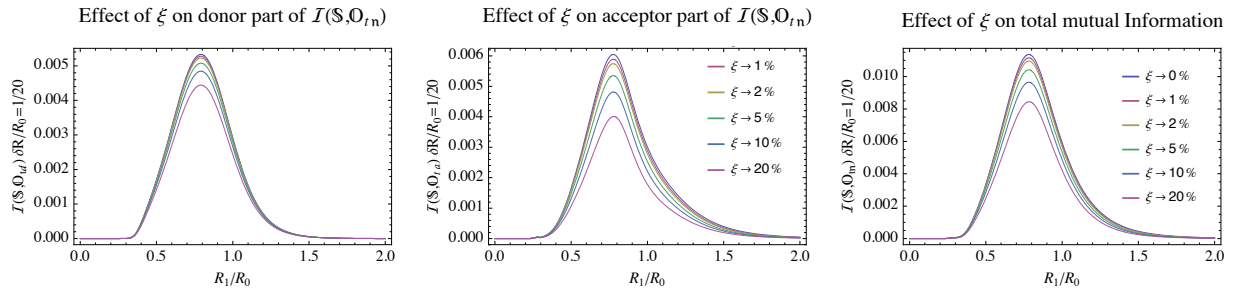

FIG. 27: **Direct Acceptor Excitation Dependence** Donor (left), Acceptor (middle), and Total (right) contributions to the Mutual information of two states separated by  $\delta R=R_0/20$  as a function of the closer state distance at varying levels of direct acceptor excitation,  $\xi$  as labeled in the figure.

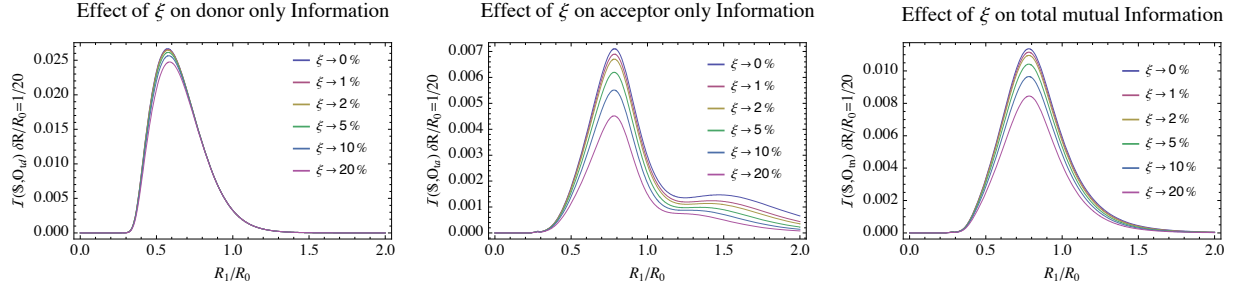

FIG. 28: **Direct Acceptor Excitation Dependence** Donor (left), Acceptor (middle), contributions to the Marginal information of two states separated by  $\delta R=R_0/20$  as a function of the closer state distance at varying levels of direct acceptor excitation,  $\xi$  as labeled in the figure compared to the Total (right) Mutual information.

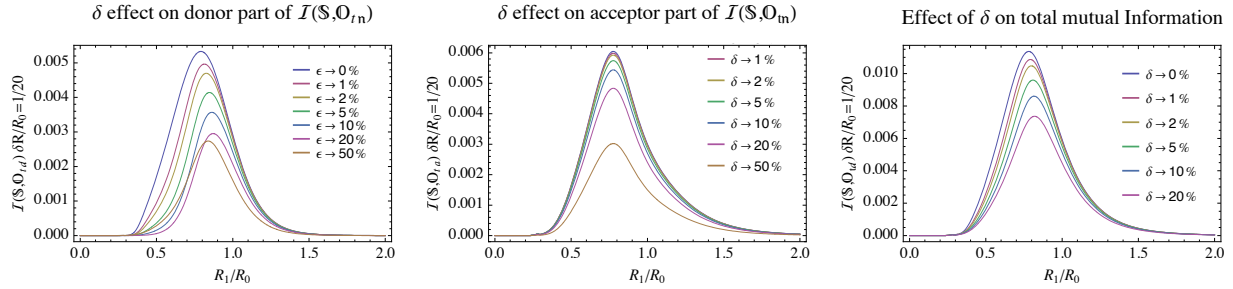

FIG. 29: **Acceptor-Donor Leakage Dependence** Donor (left), Acceptor (middle), and Total (right) contributions to the Mutual information of two states separated by  $\delta R=R_0/20$  as a function of the closer state distance at varying levels of Donor-Acceptor leakage,  $\delta$  as labeled in the figure.

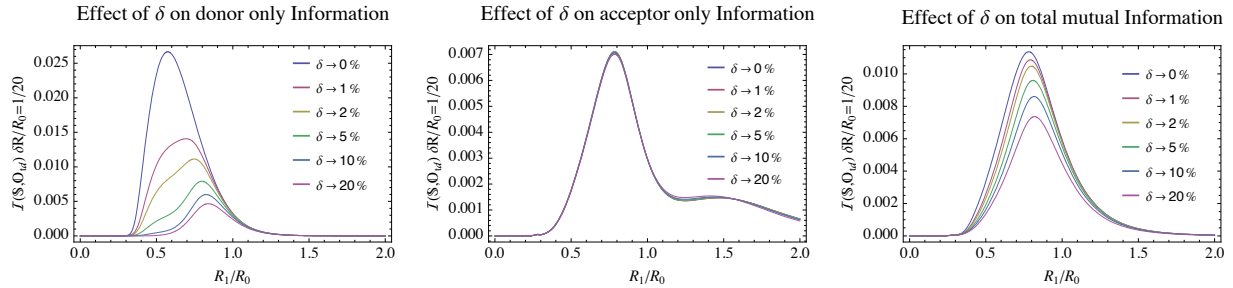

FIG. 30: **Acceptor-Donor Leakage Dependence** Donor (left), Acceptor (middle), contributions to the Marginal information of two states separated by  $\delta R=R_0/20$  as a function of the closer state distance at varying levels of Donor-Acceptor leakage,  $\delta$  as labeled in the figure compared to the Total (right) Mutual information.

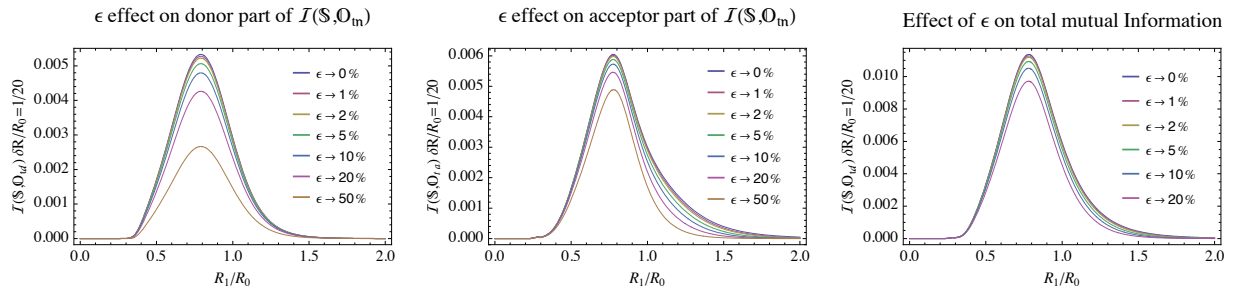

FIG. 31: **Donor-Acceptor Leakage Dependence** Donor (left), Acceptor (middle), and Total (right) contributions to the Mutual information of two states separated by  $\delta R=R_0/20$  as a function of the closer state distance at varying levels of Acceptor-Donor leakage,  $\epsilon$  as labeled in the figure.

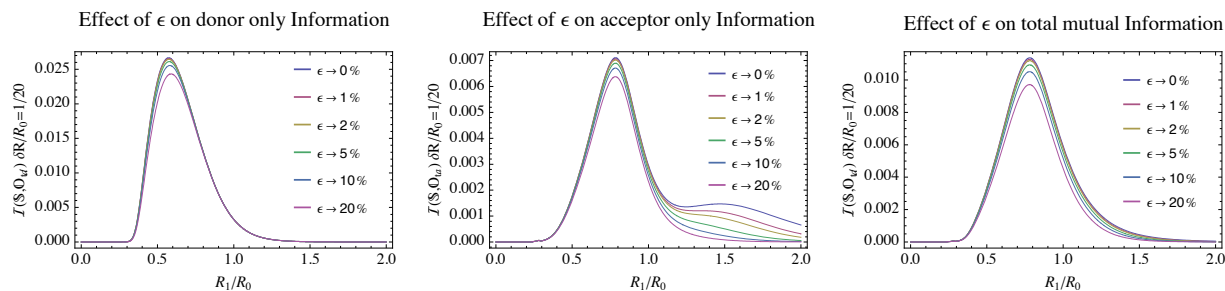

FIG. 32: **Donor-Acceptor Leakage Dependence** Donor (left), Acceptor (middle), contributions to the Marginal information of two states separated by  $\delta R=R_0/20$  as a function of the closer state distance at varying levels of Acceptor-Donor leakage,  $\epsilon$  as labeled in the figure compared to the Total (right) Mutual information.

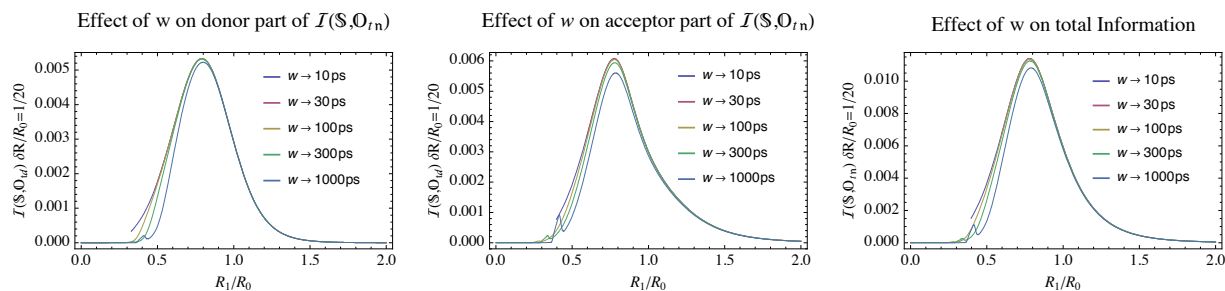

FIG. 33: **IRF width Dependence** Donor (left), Acceptor (middle), and Total (right) contributions to the Mutual information of two states separated by  $\delta R=R_0/20$  as a function of the closer state distance for several different IRF widths,  $w$  as labeled in the figure.

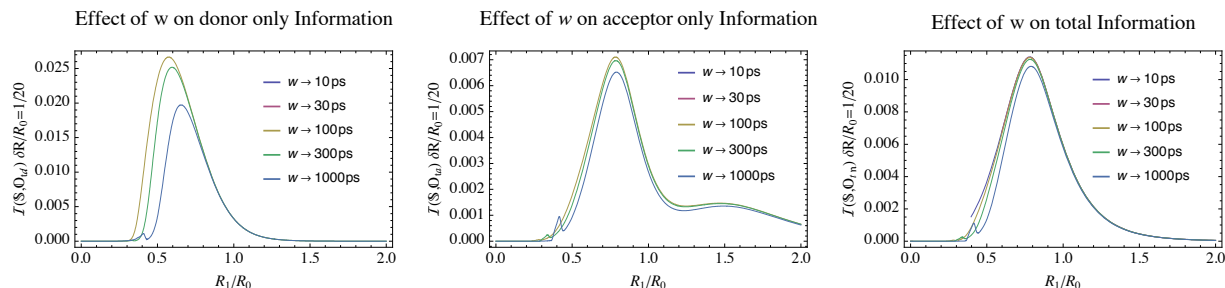

FIG. 34: **IRF width Dependence** Donor (left), Acceptor (middle), contributions to the Marginal information of two states separated by  $\delta R=R_0/20$  as a function of the closer state distance for several different IRF widths,  $w$  as labeled in the figure compared to the Total (right) Mutual information.
